# Supplementary material
Source: publisher site journal article supplement (https://www.dovepress.com/article/384716)
Supplement: Supplementary file 1 [file get_supplementary_file.php]

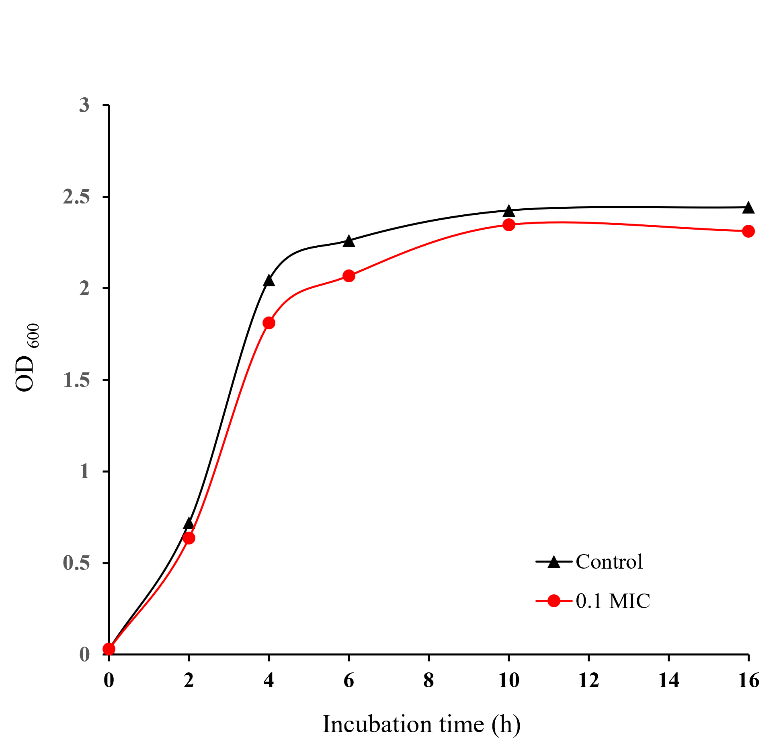


**Figure S1.** Growth curve of MRSA treated with menthone at the concentration of 0.1×MIC.


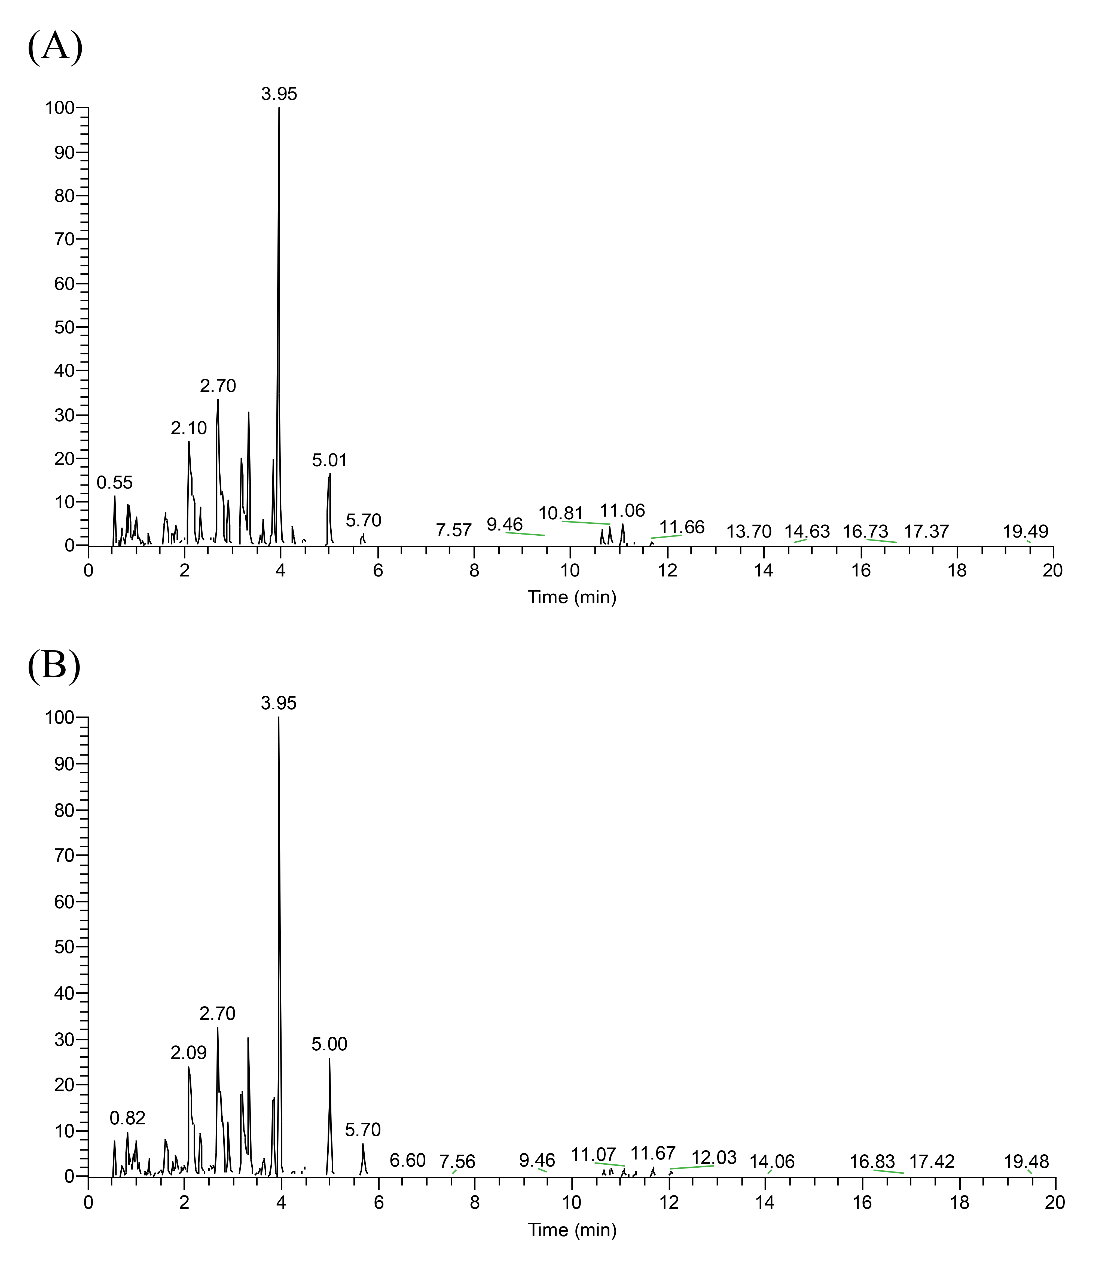


**Figure S2.** Representative BPI chromatograms of UHPLC-MS/MS analysis. (A) control group; (B) menthone-treated group.

**Table S1.** Relative quantities of lipid classes in menthone-treated group and control group.

| **Lipid classes** | **Control group** | **Menthone-treated group** | **p-value** |
| --- | --- | --- | --- |
| PG | 20.66 ± 4.56 | 20 ± 1.21 | ns |
| PI | 4.96 ± 0.28 | 4.39 ± 0.20 | 0.002 |
| PIP | 1.13 ± 0.23 | 0.81 ± 0.10 | 0.009 |
| PIP2 | 6.87 ± 1.11 | 7.27 ± 0.74 | ns |
| PIP3 | 1.31 ± 0.15 | 0.86 ± 0.26 | 0.004 |
| CL | 15.21 ± 1.49 | 9.89 ± 1.18 | <0.001 |
| MLCL | 1.32 ± 0.69 | 1.69 ± 1.06 | ns |
| DLCL | 0.22 ± 0.03 | 0.11 ± 0.02 | <0.001 |
| PS | 2.69 ± 0.26 | 2.7 ± 0.37 | ns |
| PC | 2.49 ± 0.18 | 2.82 ± 0.11 | 0.004 |
| LPG | 1.83 ± 0.50 | 1.51 ± 0.29 | ns |
| PE | 1.91 ± 0.12 | 1.55 ± 0.18 | 0.002 |
| LPE | 0.39 ± 0.12 | 0.7 ± 0.48 | ns |
| dMePE | 1.57 ± 0.14 | 1.49 ± 0.19 | ns |
| BiotinylPE | 0.57 ± 0.10 | 0.35 ± 0.09 | 0.003 |
| PEt | 2.94 ± 0.27 | 5.37 ± 0.74 | <0.001 |
| PMe | 1.54 ± 0.32 | 1.96 ± 0.29 | 0.039 |
| PA | 0.26 ± 0.07 | 0.5 ± 0.12 | 0.002 |
| LBPA | 3 ± 0.05 | 2.51 ± 0.26 | ns |
| MGDG | 9.95 ± 1.13 | 10.27 ± 2.43 | ns |
| DGDG | 9.05 ± 1.96 | 6.82 ± 0.98 | 0.032 |
| SQDG | 3.96 ± 0.42 | 4.11 ± 0.36 | ns |
| CerG3 | 0.56 ± 0.34 | 0.5 ± 0.65 | ns |
| Cer | 3.01 ± 1.04 | 8.93 ± 3.29 | 0.002 |
| CerP | 0.02 ± 0.01 | 0.05 ± 0.03 | 0.015 |
| GD2 | 1.15 ± 0.05 | 0.77 ± 0.13 | <0.001 |
| GM3 | 0.4 ± 0.15 | 0.32 ± 0.31 | ns |
| GT3 | 0.17 ± 0.05 | 0.06 ± 0.07 | 0.008 |
| FA | 0.7 ± 0.18 | 1.28 ± 0.23 | 0.001 |
| OAHFA | 0.18 ± 0.11 | 0.44 ± 0.30 | ns |

ns, non-significant.

**Table S2**. Significantly differential lipids species in MRSA cells with or without menthone treatment.

| **No.** | **Metabolites** | **Adduct** | **CalcMz** | **Formula** | **p** | **FDR** | **VIP** | **FC** |
| --- | --- | --- | --- | --- | --- | --- | --- | --- |
| 1 | PG (11:0/15:0) | [M-H]- | 637.4086 | C32H62O10N0P1 | 0.028 | 0.055 | 1.084 | 1.773 |
| 2 | PG (15:0/15:0) | [M-H]- | 693.4712 | C36H70O10N0P1 | 0.001 | 0.007 | 1.322 | 0.405 |
| 3 | PG (15:0/16:0) | [M-H]- | 707.4869 | C37H72O10N0P1 | 0.001 | 0.008 | 1.345 | 0.377 |
| 4 | PG (15:0/16:1) | [M-H]- | 705.4712 | C37H70O10N0P1 | 0.008 | 0.020 | 1.216 | 0.213 |
| 5 | PG (15:0/17:0) | [M-H]- | 721.5025 | C38H74O10N0P1 | 0.001 | 0.006 | 1.381 | 0.255 |
| 6 | PG (17:1/15:0) | [M-H]- | 719.4869 | C38H72O10N0P1 | 0.011 | 0.027 | 1.177 | 0.213 |
| 7 | PG (16:0/17:0) | [M-H]- | 735.5182 | C39H76O10N0P1 | 0.001 | 0.009 | 1.312 | 0.371 |
| 8 | PG (15:0/18:1) | [M-H]- | 733.5025 | C39H74O10N0P1 | 0.000 | 0.005 | 1.400 | 0.202 |
| 9 | PG (15:0/18:2) | [M-H]- | 731.4869 | C39H72O10N0P1 | 0.002 | 0.012 | 1.264 | 2.504 |
| 10 | PG (15:0/19:0) | [M-H]- | 749.5338 | C40H78O10N0P1 | 0.005 | 0.016 | 1.211 | 0.453 |
| 11 | PG (20:0/15:0) | [M-H]- | 763.5495 | C41H80O10N0P1 | 0.003 | 0.013 | 1.269 | 0.390 |
| 12 | PG (15:0/20:1) | [M-H]- | 761.5338 | C41H78O10N0P1 | 0.001 | 0.009 | 1.327 | 0.255 |
| 13 | PG (15:0/20:2) | [M-H]- | 759.5182 | C41H76O10N0P1 | 0.007 | 0.020 | 1.154 | 2.133 |
| 14 | PG (15:0/20:4) | [M-H]- | 755.4869 | C41H72O10N0P1 | 0.003 | 0.014 | 1.246 | 0.427 |
| 15 | PG (18:0/18:1) | [M-H]- | 775.5495 | C42H80O10N0P1 | 0.001 | 0.009 | 1.346 | 0.347 |
| 16 | PG (20:0/17:0) | [M-H]- | 791.5808 | C43H84O10N0P1 | 0.025 | 0.050 | 1.035 | 0.506 |
| 17 | PG (15:0/22:3) | [M-H]- | 785.5338 | C43H78O10N0P1 | 0.019 | 0.041 | 1.127 | 0.573 |
| 18 | PG 37:0 | [M-H]- | 791.5808 | C43H84O10N0P1 | 0.013 | 0.030 | 1.108 | 0.445 |
| 19 | PG (33:3+OO) | [M-H]- | 761.4610 | C39H70O12N0P1 | 0.000 | 0.003 | 1.359 | 0.190 |
| 20 | PG (34:3+OO) | [M-H]- | 775.4767 | C40H72O12N0P1 | 0.001 | 0.009 | 1.341 | 0.388 |
| 21 | PG (35:3+OO) | [M-H]- | 789.4923 | C41H74O12N0P1 | 0.000 | 0.003 | 1.412 | 0.282 |
| 22 | PG (36:3+OO) | [M-H]- | 803.5080 | C42H76O12N0P1 | 0.001 | 0.008 | 1.280 | 0.514 |
| 23 | PG (37:3+OO) | [M-H]- | 817.5236 | C43H78O12N0P1 | 0.004 | 0.014 | 1.189 | 0.573 |
| 24 | PG (37:6+4O) | [M-H]- | 843.4665 | C43H72O14N0P1 | 0.001 | 0.009 | 1.342 | 0.340 |
| 25 | PG (38:5+OO) | [M-H]- | 827.5080 | C44H76O12N0P1 | 0.006 | 0.018 | 1.207 | 4.073 |
| 26 | PI (20:3e/15:0) | [M-H]- | 831.5393 | C44H80O12N0P1 | 0.001 | 0.009 | 1.272 | 0.485 |
| 27 | PI (20:3e/17:0) | [M-H]- | 859.5706 | C46H84O12N0P1 | 0.014 | 0.031 | 1.092 | 0.467 |
| 28 | PI (33:3+7O) | [M-H]- | 929.4517 | C42H74O20N0P1 | 0.003 | 0.014 | 1.117 | 0.674 |
| 29 | PI (35:4+Ox) | [M-H]- | 857.4822 | C44H74O14N0P1 | 0.000 | 0.003 | 1.421 | 0.290 |
| 30 | PI (37:5+O) | [M-H]- | 885.5135 | C46H78O14N0P1 | 0.000 | 0.005 | 1.324 | 0.555 |
| 31 | PI (40:5+O) | [M-H]- | 927.5604 | C49H84O14N0P1 | 0.012 | 0.030 | 1.113 | 0.367 |
| 32 | PIP (15:0/14:1) | [M-H]- | 845.4223 | C38H71O16N0P2 | 0.006 | 0.018 | 1.223 | 0.322 |
| 33 | PIP (15:0/16:1) | [M-H]- | 873.4536 | C40H75O16N0P2 | 0.025 | 0.050 | 1.047 | 0.250 |
| 34 | PIP (18:3e/15:0) | [M-H]- | 883.4743 | C42H77O15N0P2 | 0.000 | 0.005 | 1.385 | 0.278 |
| 35 | PIP2 32:0CHO | [M-H]- | 983.4305 | C41H78O20N0P3 | 0.000 | 0.003 | 1.410 | 0.361 |
| 36 | PIP2 (14:0/18:2) | [M-H]- | 965.4199 | C41H76O19N0P3 | 0.005 | 0.015 | 1.219 | 0.499 |
| 37 | PIP2 (15:0/18:2) | [M-H]- | 979.4356 | C42H78O19N0P3 | 0.005 | 0.016 | 1.238 | 0.461 |
| 38 | PIP2 (16:0/18:2) | [M-H]- | 993.4512 | C43H80O19N0P3 | 0.000 | 0.003 | 1.418 | 0.372 |
| 39 | PIP2 (15:0/20:2) | [M-H]- | 1007.4669 | C44H82O19N0P3 | 0.004 | 0.015 | 1.096 | 0.712 |
| 40 | PIP2 (15:0/22:2) | [M-H]- | 1035.4982 | C46H86O19N0P3 | 0.004 | 0.014 | 1.081 | 0.694 |
| 41 | PIP2 (33:3+8O) | [M-H]- | 1105.3792 | C42H76O27N0P3 | 0.048 | 0.085 | 1.014 | 0.157 |
| 42 | PIP2 (35:4+3O) | [M-H]- | 1051.4203 | C44H78O22N0P3 | 0.000 | 0.003 | 1.393 | 0.385 |
| 43 | PIP2 (35:5+OO) | [M-H]- | 1033.4098 | C44H76O21N0P3 | 0.006 | 0.018 | 1.202 | 0.496 |
| 44 | PIP2 (36:5+OO) | [M-H]- | 1047.4254 | C45H78O21N0P3 | 0.001 | 0.008 | 1.315 | 0.290 |
| 45 | PIP2 (37:5+2O) | [M-H]- | 1061.4411 | C46H80O21N0P3 | 0.000 | 0.003 | 1.398 | 0.324 |
| 46 | PIP2 (39:5+OO) | [M-H]- | 1089.4724 | C48H84O21N0P3 | 0.008 | 0.020 | 1.060 | 0.769 |
| 47 | PIP2 (40:5+OO) | [M-H]- | 1103.4880 | C49H86O21N0P3 | 0.003 | 0.013 | 1.052 | 0.720 |
| 48 | PIP3 (33:1+O) | [M-H]- | 1077.4125 | C42H81O23N0P4 | 0.000 | 0.003 | 1.395 | 0.338 |
| 49 | PIP3 (33:2+6O) | [M-H]- | 1155.3714 | C42H79O28N0P4 | 0.006 | 0.018 | 1.222 | 0.421 |
| 50 | PIP3 (36:5+8O) | [M-H]- | 1223.3612 | C45H79O30N0P4 | 0.000 | 0.005 | 1.353 | 0.248 |
| 51 | PIP3 (37:5+8O) | [M-H]- | 1237.3769 | C46H81O30N0P4 | 0.008 | 0.022 | 1.160 | 0.493 |
| 52 | PIP3 (38:5+8O) | [M-H]- | 1251.3925 | C47H83O30N0P4 | 0.004 | 0.014 | 1.279 | 0.245 |
| 53 | PIP3 (39:5+8O) | [M-H]- | 1265.4082 | C48H85O30N0P4 | 0.000 | 0.003 | 1.428 | 0.416 |
| 54 | CL (15:0/15:0/15:0/16:0) | [M-H]- | 1309.9180 | C70H135O17P2 | 0.024 | 0.049 | 1.170 | 1.830 |
| 55 | CL (17:0/15:0/15:0/18:0) | [M-H]- | 1365.9806 | C74H143O17P2 | 0.010 | 0.026 | 1.041 | 0.239 |
| 56 | CL 67:3 | [M-2H]- | 693.4788 | C76H140O17P2 | 0.004 | 0.014 | 1.187 | 0.367 |
| 57 | CL 75:3 | [M-H]- | 1500.0902 | C84H157O17P2 | 0.017 | 0.037 | 1.145 | 0.267 |
| 58 | CL 77:5 | [M-2H]- | 761.5414 | C86H156O17P2 | 0.038 | 0.072 | 1.037 | 0.422 |
| 59 | CL 79:14 | [M-H]- | 1533.9806 | C88H143O17P2 | 0.010 | 0.025 | 1.276 | 0.187 |
| 60 | CL 79:5 | [M-2H]- | 775.5571 | C88H160O17P2 | 0.002 | 0.012 | 1.298 | 0.341 |
| 61 | CL 81:14 | [M-H]- | 1562.0119 | C90H147O17P2 | 0.002 | 0.012 | 1.293 | 0.320 |
| 62 | CL 81:3 | [M-2H]- | 791.5884 | C90H168O17P2 | 0.015 | 0.033 | 1.098 | 0.461 |
| 63 | CL 81:5 | [M-2H]- | 789.5727 | C90H164O17P2 | 0.008 | 0.020 | 1.195 | 0.356 |
| 64 | CL 83:14 | [M-H]- | 1590.0432 | C92H151O17P2 | 0.002 | 0.010 | 1.315 | 0.290 |
| 65 | CL 83:5 | [M-2H]- | 803.5884 | C92H168O17P2 | 0.008 | 0.021 | 1.162 | 0.418 |
| 66 | CL 85:5 | [M-2H]- | 817.6040 | C94H172O17P2 | 0.013 | 0.030 | 1.138 | 0.346 |
| 67 | DLCL 33:3 | [M-H]- | 883.4743 | C42H77O15P2 | 0.000 | 0.005 | 1.388 | 0.277 |
| 68 | PS (15:0/17:0) | [M-H]- | 734.4978 | C38H73O10N1P1 | 0.042 | 0.077 | 1.020 | 0.404 |
| 69 | PS (33:2+3O) | [M-H]- | 792.4669 | C39H71O13N1P1 | 0.003 | 0.013 | 1.250 | 0.359 |
| 70 | PS (35:5+4O) | [M-H]- | 830.4461 | C41H69O14N1P1 | 0.007 | 0.019 | 1.185 | 0.491 |
| 71 | PS (35:5+5O) | [M-H]- | 846.4410 | C41H69O15N1P1 | 0.005 | 0.016 | 1.209 | 0.435 |
| 72 | PS (37:5+4O) | [M-H]- | 858.4774 | C43H73O14N1P1 | 0.000 | 0.003 | 1.423 | 0.310 |
| 73 | PS (37:5+5O) | [M-H]- | 874.4723 | C43H73O15N1P1 | 0.000 | 0.003 | 1.420 | 0.274 |
| 74 | PS (39:5+5O) | [M-H]- | 902.5036 | C45H77O15N1P1 | 0.001 | 0.007 | 1.214 | 0.623 |
| 75 | PC (33:3+3O) | [M+HCOO]- | 834.5138 | C42H77O13N1P1 | 0.003 | 0.013 | 1.244 | 0.534 |
| 76 | PC (37:6+5O) | [M+HCOO]- | 916.5193 | C46H79O15N1P1 | 0.003 | 0.013 | 1.177 | 0.601 |
| 77 | LPG 17:0 | [M-H]- | 497.2885 | C23H46O9N0P1 | 0.015 | 0.032 | 1.110 | 0.451 |
| 78 | LPG 20:0 | [M-H]- | 539.3354 | C26H52O9N0P1 | 0.001 | 0.009 | 1.286 | 0.298 |
| 79 | PE (33:3+5O) | [M-H]- | 778.4512 | C38H69O13N1P1 | 0.023 | 0.048 | 1.093 | 0.543 |
| 80 | PE (35:3+3O) | [M-H]- | 774.4927 | C40H73O11N1P1 | 0.023 | 0.048 | 1.101 | 0.209 |
| 81 | PE (36:3+5O) | [M-H]- | 820.4982 | C41H75O13N1P1 | 0.004 | 0.014 | 1.228 | 0.543 |
| 82 | PE (37:6+7O) | [M-H]- | 860.4567 | C42H71O15N1P1 | 0.003 | 0.013 | 1.247 | 0.402 |
| 83 | PE (38:3+5O) | [M-H]- | 848.5295 | C43H79O13N1P1 | 0.001 | 0.007 | 1.322 | 0.448 |
| 84 | dMePE (33:3+3O) | [M-H]- | 774.4927 | C40H73O11N1P1 | 0.044 | 0.081 | 1.001 | 0.216 |
| 85 | dMePE (33:3+5O) | [M-H]- | 806.4825 | C40H73O13N1P1 | 0.001 | 0.006 | 1.380 | 0.273 |
| 86 | dMePE (35:3+5O) | [M-H]- | 834.5138 | C42H77O13N1P1 | 0.003 | 0.013 | 1.244 | 0.534 |
| 87 | BiotinylPE 35:2 | [M-H]- | 954.6012 | C50H89O10N3S1P1 | 0.003 | 0.013 | 1.233 | 0.358 |
| 88 | PEt (33:3+4O) | [M-H]- | 747.4454 | C38H68O12N0P1 | 0.004 | 0.014 | 1.261 | 0.448 |
| 89 | PEt (37:5+4O) | [M-H]- | 799.4767 | C42H72O12N0P1 | 0.002 | 0.012 | 1.217 | 2.682 |
| 90 | PEt (37:6+3O) | [M-H]- | 781.4661 | C42H70O11N0P1 | 0.000 | 0.003 | 1.408 | 0.269 |
| 91 | PEt (37:6+6O) | [M-H]- | 829.4509 | C42H70O14N0P1 | 0.008 | 0.021 | 1.166 | 0.495 |
| 92 | PEt (40:6+6O) | [M-H]- | 871.4978 | C45H76O14N0P1 | 0.003 | 0.013 | 1.178 | 0.622 |
| 93 | PEt (40:8+6O) | [M-H]- | 867.4665 | C45H72O14N0P1 | 0.000 | 0.003 | 1.388 | 3.564 |
| 94 | PEt (42:6+6O) | [M-H]- | 899.5291 | C47H80O14N0P1 | 0.000 | 0.005 | 1.311 | 0.525 |
| 95 | PEt (42:8+6O) | [M-H]- | 895.4978 | C47H76O14N0P1 | 0.013 | 0.030 | 1.198 | 3.624 |
| 96 | PEt (37:6+6O) | [M-H]- | 815.4352 | C41H68O14N0P1 | 0.006 | 0.019 | 1.204 | 0.538 |
| 97 | PMe 37:6 | [M-H]- | 719.4657 | C41H68O8N0P1 | 0.007 | 0.020 | 1.158 | 0.368 |
| 98 | PMe 39:6 | [M-H]- | 747.4970 | C43H72O8N0P1 | 0.000 | 0.005 | 1.389 | 0.214 |
| 99 | PA (20:5/22:6) | [M-H]- | 765.4501 | C45H66O8N0P1 | 0.033 | 0.064 | 1.095 | 0.336 |
| 100 | LBPA 16:0/18:0 | [M-H]- | 749.5338 | C40H78O10P1 | 0.005 | 0.017 | 1.209 | 0.456 |
| 101 | LBPA 16:0/20:1 | [M-H]- | 775.5495 | C42H80O10P1 | 0.001 | 0.008 | 1.335 | 0.363 |
| 102 | MGDG (16:0/15:0) | [M+HCOO]- | 761.5421 | C41H77O12 | 0.002 | 0.011 | 1.255 | 0.423 |
| 103 | MGDG (15:0/17:0) | [M+HCOO]- | 775.5577 | C42H79O12 | 0.003 | 0.013 | 1.289 | 0.345 |
| 104 | MGDG (18:0/15:0) | [M+HCOO]- | 789.5734 | C43H81O12 | 0.011 | 0.026 | 1.159 | 0.372 |
| 105 | MGDG (15:0/19:0) | [M+HCOO]- | 803.5890 | C44H83O12 | 0.031 | 0.060 | 1.040 | 0.507 |
| 106 | MGDG (20:0/15:0) | [M+HCOO]- | 817.6047 | C45H85O12 | 0.013 | 0.030 | 1.138 | 0.346 |
| 107 | MGDG 34:0e | [M-H]- | 743.6043 | C43H83O9 | 0.003 | 0.014 | 1.228 | 0.337 |
| 108 | MGDG 37:8 | [M+HCOO]- | 829.5108 | C47H73O12 | 0.000 | 0.003 | 1.316 | 0.444 |
| 109 | MGDG 47:12 | [M+HCOO]- | 961.6047 | C57H85O12 | 0.026 | 0.051 | 1.072 | 0.370 |
| 110 | DGDG (15:0/15:0) | [M+HCOO]- | 909.5792 | C46H85O17 | 0.014 | 0.031 | 1.143 | 0.573 |
| 111 | DGDG (16:0/15:0) | [M+HCOO]- | 923.5949 | C47H87O17 | 0.002 | 0.010 | 1.327 | 0.319 |
| 112 | DGDG (15:0/17:0) | [M+HCOO]- | 937.6105 | C48H89O17 | 0.001 | 0.009 | 1.346 | 0.251 |
| 113 | DGDG (18:0/15:0) | [M+HCOO]- | 951.6262 | C49H91O17 | 0.005 | 0.016 | 1.230 | 0.359 |
| 114 | DGDG (15:0/19:0) | [M+HCOO]- | 965.6418 | C50H93O17 | 0.002 | 0.012 | 1.262 | 0.404 |
| 115 | DGDG (20:0/15:0) | [M+HCOO]- | 979.6575 | C51H95O17 | 0.005 | 0.016 | 1.231 | 0.329 |
| 116 | DGDG 34:2 | [M+HCOO]- | 961.6105 | C50H89O17 | 0.024 | 0.049 | 1.078 | 0.373 |
| 117 | SQDG 31:2e | [M+HCOO]- | 807.4934 | C41H75O13S1 | 0.007 | 0.019 | 1.154 | 0.661 |
| 118 | SQDG 32:1 | [M-H]- | 791.4985 | C41H75O12S1 | 0.000 | 0.006 | 1.381 | 0.282 |
| 119 | SQDG 32:5 | [M+HCOO]- | 829.4414 | C42H69O14S1 | 0.009 | 0.024 | 1.167 | 0.509 |
| 120 | SQDG 34:5 | [M+HCOO]- | 857.4727 | C44H73O14S1 | 0.000 | 0.003 | 1.418 | 0.295 |
| 121 | SQDG 35:5 | [M+HCOO]- | 871.4883 | C45H75O14S1 | 0.006 | 0.018 | 1.110 | 0.656 |
| 122 | SQDG 35:6 | [M+HCOO]- | 869.4727 | C45H73O14S1 | 0.035 | 0.066 | 1.002 | 0.469 |
| 123 | SQDG 36:5 | [M+HCOO]- | 885.5040 | C46H77O14S1 | 0.002 | 0.010 | 1.246 | 0.614 |
| 124 | SQDG 37:5 | [M+HCOO]- | 899.5196 | C47H79O14S1 | 0.001 | 0.007 | 1.287 | 0.548 |
| 125 | Cer (d18:0/23:0) | [M+HCOO]- | 682.6355 | C42H84O5N1 | 0.004 | 0.014 | 1.252 | 3.318 |
| 126 | Cer (t17:0/23:0+O) | [M+HCOO]- | 700.6097 | C41H82O7N1 | 0.021 | 0.045 | 1.045 | 2.145 |
| 127 | Cer (t17:0/25:0+O) | [M+HCOO]- | 728.6410 | C43H86O7N1 | 0.006 | 0.018 | 1.304 | 6.759 |
| 128 | Cer (t17:0/26:0+O) | [M+HCOO]- | 742.6566 | C44H88O7N1 | 0.006 | 0.017 | 1.290 | 5.549 |
| 129 | Cer (t44:0+O) | [M+HCOO]- | 756.6723 | C45H90O7N1 | 0.021 | 0.045 | 1.200 | 3.868 |
| 130 | CerP (d39:1+O) | [M+HCOO]- | 748.5498 | C40H79O9N1P1 | 0.023 | 0.048 | 1.054 | 0.615 |
| 131 | GD2 d35:0 | [M-2H]- | 830.4524 | C77H136O34N4 | 0.006 | 0.019 | 1.190 | 0.484 |
| 132 | GD2 d35:1 | [M-2H]- | 829.4445 | C77H134O34N4 | 0.010 | 0.026 | 1.147 | 0.501 |
| 133 | GD2 d37:1 | [M-2H]- | 843.4602 | C79H138O34N4 | 0.001 | 0.007 | 1.364 | 0.354 |
| 134 | GD2 d39:0 | [M-2H]- | 858.4837 | C81H144O34N4 | 0.000 | 0.003 | 1.419 | 0.300 |
| 135 | GD2 d39:1 | [M-2H]- | 857.4758 | C81H142O34N4 | 0.000 | 0.003 | 1.418 | 0.296 |
| 136 | GT3 d36:2 | [M+HCOO]- | 1805.9179 | C82H141O39N4 | 0.005 | 0.015 | 1.303 | 0.169 |

PG, phosphatidylglycerol; PI, phosphatidylinositol; PIP, phosphatidylinositol phosphate; PIP2, phosphatidylinositol diphosphate; PIP3, phosphatidylinositol triphosphate; CL, cardiolipin; DLCL, di-lyso cardiolipin; PS, phosphatidylserine; PC, phosphatidylcholine; LPG, lyso phosphatidylcholine; PE, phosphatidylethanolamine; dMePE, dimethylphosphatidylethanolamine; BiotinylPE, glycerophosphoethanolamine-N-biotinyl; PEt, phosphatidylethanol; PMe, Phosphatidylmethanol; PA, phosphatidic acid; MGDG, monogalactosyl diacylglycerol; DGDG, digalactosyl diacylglycerol; SQDG, sulfoquinovosyl diacylglycerol; Cer, ceramide; CerP, ceramide phosphate; GD2, ganglioside, disialo trihexosyl ceramide; GT3, ganglioside,trisialo dihexosyl ceramide.

**Table S3.** The binding energies of menthone to the top10 hub targets in PPIs network.

| Target | Protein name | Degree | | Binding energy（kcal/mol) |
| --- | --- | --- | --- | --- |
| PLD2 | Phospholipase D2 | 45 | -6.06 | |
| PLD1 | Phospholipase D1 | 44 | -5.44 | |
| CHPT1 | Cholinephosphotransferase 1 | 38 | -5.24 | |
| LPCAT4 | Lysophospholipid acyltransferase | 33 | -5.09 | |
| PPAP2C | Phospholipid phosphatase 2 | 28 | -5.29 | |
| PPAP2B | Phospholipid phosphatase 3 | 28 | -5.15 | |
| AGPAT3 | 1-acyl-sn-glycerol-3-phosphate acyltransferase gamma | 28 | -5.67 | |
| PEMT | Phosphatidylethanolamine N-methyltransferase | 26 | -6.11 | |
| AGPAT2 | 1-acyl-sn-glycerol-3-phosphate acyltransferase beta | 25 | -5.21 | |
| PISD | Phosphatidylserine decarboxylase proenzyme | 25 | -5.35 | |
